# Supplementary material for: Salivary Microbiota for Gastric Cancer Prediction: An Exploratory Study
Source: PubMed Central journal article supplement (PMC7988213; doi:10.3389/fcimb.2021.640309), 2021-03-10

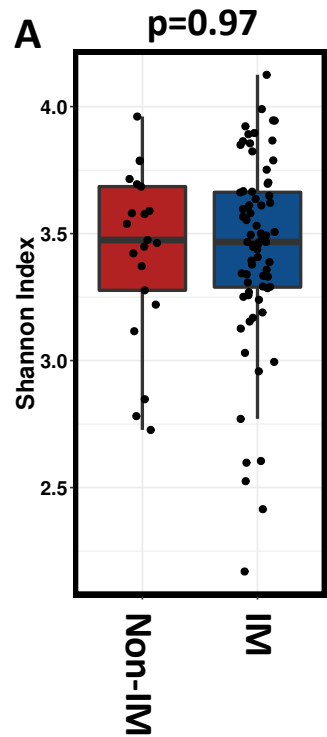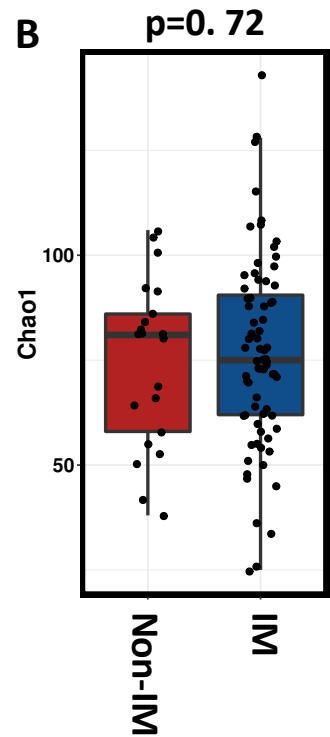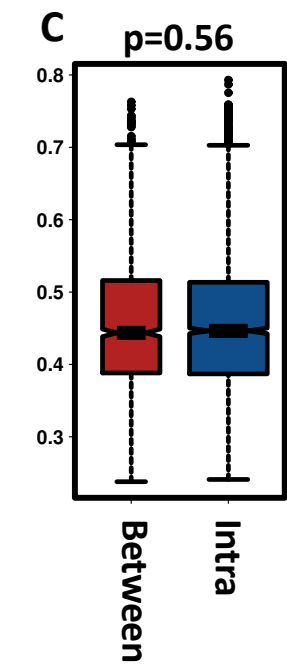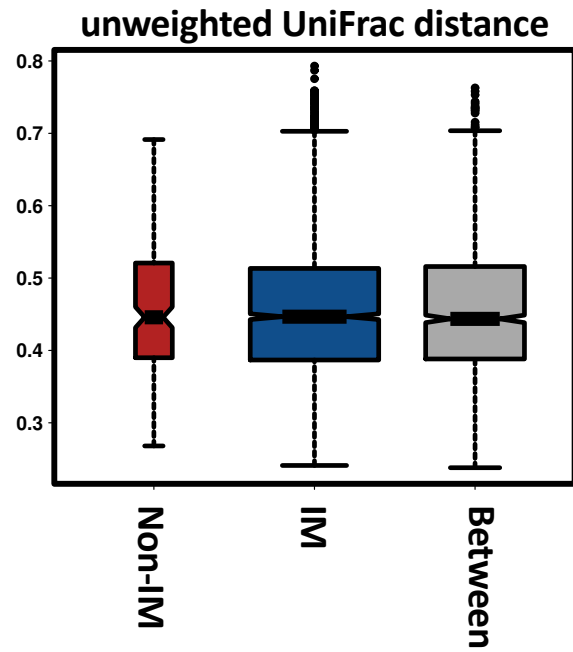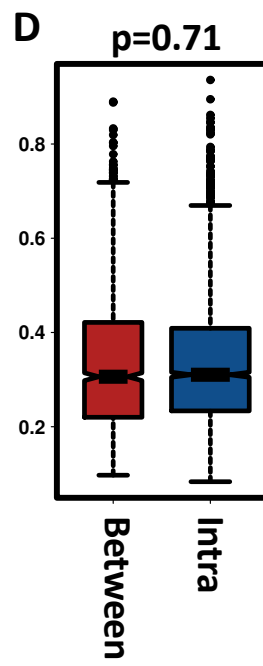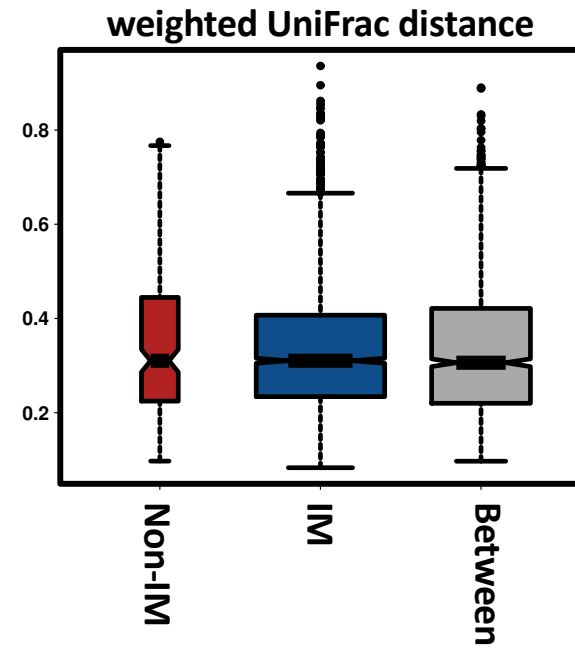

Supplement: Image_1.pdf [file Image_1.pdf]
